RESEARCH ARTICLE

# Effects of Essential Oil from Hinoki Cypress, *Chamaecyparis obtusa*, on Physiology and Behavior of Flies

Shin-Hae Lee<sup>☯</sup>, Hyung-Seok Do<sup>☯</sup>, Kyung-Jin Min<sup>\*</sup>

Department of Biological Sciences, Inha University, Incheon, Korea

☯ These authors contributed equally to this work.

\* [minkj@inha.ac.kr](mailto:minkj@inha.ac.kr)

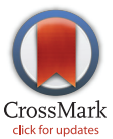

OPEN ACCESS

**Citation:** Lee S-H, Do H-S, Min K-J (2015) Effects of Essential Oil from Hinoki Cypress, *Chamaecyparis obtusa*, on Physiology and Behavior of Flies. PLoS ONE 10(12): e0143450. doi:10.1371/journal.pone.0143450

**Editor:** Hiromu Tanimoto, Tohoku University, JAPAN

**Received:** August 13, 2015

**Accepted:** November 4, 2015

**Published:** December 1, 2015

**Copyright:** © 2015 Lee et al. This is an open access article distributed under the terms of the [Creative Commons Attribution License](https://creativecommons.org/licenses/by/4.0/), which permits unrestricted use, distribution, and reproduction in any medium, provided the original author and source are credited.

**Data Availability Statement:** All relevant data are within the paper.

**Funding:** This work was supported by National Research Foundation of Korea (NRF) grant funded by the Korea government (MEST) (No. 2015R1A2A2A01005580, [www.nrf.re.kr](http://www.nrf.re.kr)) and grant funded by Inha University (No 51753-01, [www.inha.ac.kr](http://www.inha.ac.kr)) to KJM. The funders had no role in study design, data collection and analysis, decision to publish, or preparation of the manuscript.

**Competing Interests:** The authors have declared that no competing interests exist.

## Abstract

Phytoncides, which are volatile substances emitted from plants for protection against plant pathogens and insects, are known to have insecticidal, antimicrobial, and antifungal activities. In contrast to their negative effects on microorganisms and insects, phytoncides have been shown to have beneficial effects on human health. Essential oil from Hinoki cypress (*Chamaecyparis obtusa*) is mostly used in commercial products such as air purifiers. However, the physiological/behavioral impact of essential oil from *C. obtusa* on insects is not established. In this study, we tested the effects of essential oil extracted from *C. obtusa* on the physiologies and behaviors of *Drosophila melanogaster* and *Musca domestica*. Exposure to essential oil from *C. obtusa* decreased the lifespan, fecundity, locomotive activity, and developmental success rate of *D. melanogaster*. In addition, both fruit flies and house flies showed strong repellent behavioral responses to the essential oil, with duration times of about 5 hours at 70 µg/ml. These results suggest that essential oil from *C. obtusa* can be used as a ‘human-friendly’ alternative insect repellent.

## Introduction

In nature, plants are usually exposed to various environmental stresses such as dehydration, pollutants, UV radiation, pathogen infection, and attack by herbivorous insects. In response to these stresses, plants have developed their own defense systems [1]. Phytoncides are volatile organic compounds emitted by plants that protect against plant pathogens and insects [2]. Phytoncides possess strong antimicrobial and insecticidal activities and are applied in many fields as food preservatives and insect repellents [3–5]. For example, essential oils from herbs such as rosemary, oregano, clove, and thyme are reported to have antimicrobial activities against *Listeria*, *Salmonella*, and *E. coli* O157 [5]. In addition, essential oil from *Artemisia absinthium* is toxic to developing larvae of *D. melanogaster* [6].

In contrast to their negative effects on microorganisms and insects, phytoncides have been shown to have beneficial effects on human health. For example, cellular damage by reactive oxygen species and UV-induced matrix metalloproteinase-1 activity was shown to be

significantly reduced by phytoncides in human dermal cells [7]. Phytoncides extracted from a mixed homogenate of 118 plants also was found to reduce the level of noradrenaline, a stress hormone, in stroke-prone spontaneously hypertensive rats [8]. In addition, in East Asian countries, people are commonly fascinated by walking among forests, a practice known as “forest bathing”, to improve their health [9, 10]. The number of natural killer cells and levels of intracellular anticancer proteins were reported to increase when subjects were exposed to phytoncides during forest bathing [11]. In this regard, many related commercial products such as air purifiers or deodorants have been developed.

Hinoki cypress, *Chamaecyparis obtusa*, is the representative tree of forest bathing, and essential oil from *C. obtusa* is widely used in commercial products. This essential oil promotes proliferation and division of hair follicle cells through induction of vascular endothelial growth factor [12, 13] and has anti-atopic activity in mice [14]. Furthermore,  $\beta$ -thujaplicin (hinokiol), one of the constituents of *C. obtusa* essential oil, was recently reported to suppress proliferation of breast cancer cells [15] and have anti-inflammatory effects in mice [16].

Although essential oil from *C. obtusa* is widely used and its beneficial effects are well investigated, the physiological/behavioral impact of this essential oil on insects is not well established. Park et al (2003) previously showed that some components of this essential oil were able to induce over 90% adult mortality in *Callosobruchus chinensis* within 1–2 days [17], although the long-term effects of essential oil on insect physiology and behavior are not well known. Moreover, the concentrations of essential oil used previously do not reflect the actual concentrations used in commercial products. In this study, we tested the effects of essential oil extracted from *C. obtusa* on the physiologies and behaviors of fruit flies (*D. melanogaster*) and house flies (*Musca domestica*). Effects of essential oil on development, longevity, fecundity, and locomotive activity were measured using fruit flies, and repellent activity was measured using fruit flies and house flies.

## Materials and Methods

### Fly strain and maintenance

A study was conducted using Canton-S, a wild-type strain of fruit fly (*D. melanogaster*), which was provided from the Bloomington stock center (Indiana University, USA). Larvae of house flies, *M. domestica*, were purchased from a local fishing gear shop (Cheongyang gear shop, Cheongyangri-dong, Seoul, Korea) and reared into adults in the laboratory. Both flies were maintained in the culture room at 24°C with 45% humidity and exposed to light and dark for 12 hours. Standard cornmeal-sugar-yeast with agar (CSY) medium [18] was used for rearing larvae of fruit flies and house flies. When flies were eclosed as adults, standard sugar-yeast (SY) medium [18] was provided to fruit flies, whereas sugar and water were provided to house flies [19]. Flies exposed to essential oil from *C. obtusa* were reared in a separate incubator to prevent the effects of phytoncides on non-exposed flies by diffusion.

### Exposure to *C. obtusa* essential oil

Steam distilled essential oil extracted from leaves and branches of *C. obtusa* was purchased from “In The Forest Co., Ltd.” (Seoul, Korea) and delivered to flies at concentrations of 25 or 70  $\mu\text{g/ml}$  after dilution with distilled water. Final concentrations of the essential oil were determined based on the actual concentrations used in commercial products. Essential oil from *C. obtusa* was delivered by feeding or fumigation. Detailed method of delivery is described below.

## Lifespan assays

Newly eclosed 100 male and 100 female adult fruit flies were transferred to 500 cm<sup>3</sup> demography cages, and three replicate cages were set up for each group. For essential oil delivery by fumigation, two vials were affixed into a demography cage—one for food delivery and one for essential oil fumigant delivery. A vial containing normal fresh media was affixed to one side, and a vial containing filter paper soaked with 100  $\mu$ l of diluted essential oil was affixed to another side. Mesh was placed inside of the vial containing essential oil to block direct contact with flies. For delivery of essential oil by feeding, undiluted essential oil was mixed with food media with a final concentration of 25 or 70  $\mu$ g/ml, and this food vial was affixed into the demography cage. The vials containing fresh SY media and filter paper soaked with essential oil were changed every 2 days, at which time the number of dead flies was counted.

## Pupation frequency

Canton-S female flies were maintained on a 90 mm plate containing CSY food for 12 hours for oviposition, and laid eggs were transferred into polystyrene vials with a fine brush at a density of 10 eggs per vial. Twenty replicate vials were set up for each group. For delivery of essential oil by fumigation, a cotton vial plug was soaked with an appropriate 100  $\mu$ l of essential oil. For delivery of essential oil by feeding, the eggs were transferred to and reared on essential oil-mixed food media. The number of newly formed pupae was checked daily. Pupation frequency was given by the total number of pupae divided by the number of eggs laid.

## Locomotion activity

Climbing ability of flies was measured by using rapid iterative negative geotaxis (RING) assay [20] with some modifications. Adult fruit flies were exposed to essential oil fumigant for 10 days via soaking cotton vials with 100  $\mu$ l of diluted essential oil or distilled water and then transferred to glass vials—10 males and 10 females in each vial. These vials were loaded into the apparatus and tapped on a table three times in rapid succession to initiate a negative geotaxis response. The positions of flies were captured by a digital camera 4 sec after initiation of behavior, and the number of flies that climbed above the standards (40 mm and 80 mm from the bottom) was counted. After each trial, the flies were allowed 1 min of recovery from shock. These cycles were conducted four times with 10 replicates in each group.

## Fecundity assay

Within the first 24 hours of eclosion, adult fruit flies were collected, and each vial containing fresh SY media was set up with two males and one female. A cotton vial plug was soaked with 100  $\mu$ l of essential oil. Flies were transferred every 24 hours to new vials with fresh cotton plugs soaked with essential oil or distilled water, and the number of laid eggs was counted for 5 days [21].

## Repellent test

To test the repellent activity of essential oil of *C. obtusa*, we used T-maze assay with minor modifications [22]. Briefly, two food vials—one with and one without essential oil—were installed at opposite sides of the cage described in the lifespan assay. A funnel made of filter paper was inserted into each vial so that flies could move in only one direction. Cotton plugs soaked with 100  $\mu$ l of essential oil or distilled water were placed at the bottom of the vials, and 100 male flies were transferred to the cage after starvation for 4 hours in advance. The number of flies moved into each vial was counted every 10 minutes for at least 5 hours. Three replicates were established for each group.

## Measurement of phytoncides duration time

Duration time of repellency was measured by a similar method as the repellent test. Demography cages were set up with two vials (with essential oil or distilled water), and 100  $\mu$ l of essential oil was supplemented to the cotton plugs, which were placed at the bottom of food vial. Flies were transferred to the cage immediately or 2, 4, or 6 hours after administration of essential oil, and the numbers of flies that moved to each vial were counted every 10 minutes. Three replicates were established for each group.

## Statistical analysis

Standard survival models in the JMP software (SAS Institute, Cary, NC, USA) were used for log-rank test of survivorship. One-way analyses of variance (ANOVA) or Chi-squared test were performed to compare the data in the development, fecundity, locomotion tests, and repellent test. Asterisks on figures were used to indicate significant differences compared to the control.

## Gas chromatography-mass spectrometry

The information on chemical composition of *C. obtusa* essential oil was provided by the manufacturer (In The Forest Co. Ltd.). Essential oil from *C. obtusa* leaves and branches was analyzed using a gas chromatograph-mass selective detector (Agilent 7890A). The gas chromatography conditions were as follows: GC column, HP-5MS; injector temperature, 270°C; carrier gas, Helium; rate, 1 mL/min; oven temperature, 40°C to 250°C at 3°C/min.

## Results

### Effects of *C. obtusa* essential oil on survival of *D. melanogaster*

Essential oils usually contain 20–60 components. Gas chromatography mass spectrometry analysis (GC/MS) revealed that the essential oil from *C. obtusa* used in our experiments contains several terpenes. The main components were identified as  $\alpha$ -Terpinolene (19.45%), (+)-3-Carene (15.17%),  $\alpha$ -Pinene (10.12%), Sabinene (6.27%), and  $\gamma$ -Terpinene (4.77%) (Table 1).

The survival rate of fruit flies exposed to essential oil from *C. obtusa* was measured. The essential oil was delivered either by food ingestion or fumigation. Ingestion of essential oil with

**Table 1. Major components in essential oil from *C. obtusa* identified by GC-MS analysis.**

| Number | Compound              | RT (min) <sup>a</sup> | Area (%) <sup>b</sup> | Quality (%) |
|--------|-----------------------|-----------------------|-----------------------|-------------|
| 1      | $\alpha$ -Pinene      | 9.07                  | 10.12                 | 97          |
| 2      | Camphene              | 9.62                  | 1.89                  | 98          |
| 3      | Sabinene              | 10.69                 | 6.27                  | 96          |
| 4      | 2- $\beta$ -Pinene    | 10.78                 | 2.20                  | 97          |
| 5      | $\beta$ -Mycene       | 11.48                 | 1.18                  | 96          |
| 6      | (+)-3-Carene          | 12.28                 | 15.17                 | 97          |
| 7      | $\alpha$ -Terpinene   | 12.55                 | 2.85                  | 98          |
| 8      | -Cymene               | 12.90                 | 1.82                  | 97          |
| 9      | $\gamma$ -Terpinene   | 14.47                 | 4.77                  | 97          |
| 10     | $\alpha$ -Terpinolene | 15.87                 | 19.45                 | 98          |
| 11     | L-Bonyl acetate       | 24.90                 | 2.07                  | 99          |

<sup>a</sup> Retention time.

<sup>b</sup> The relative amount of the sub-fraction.

doi:10.1371/journal.pone.0143450.t001

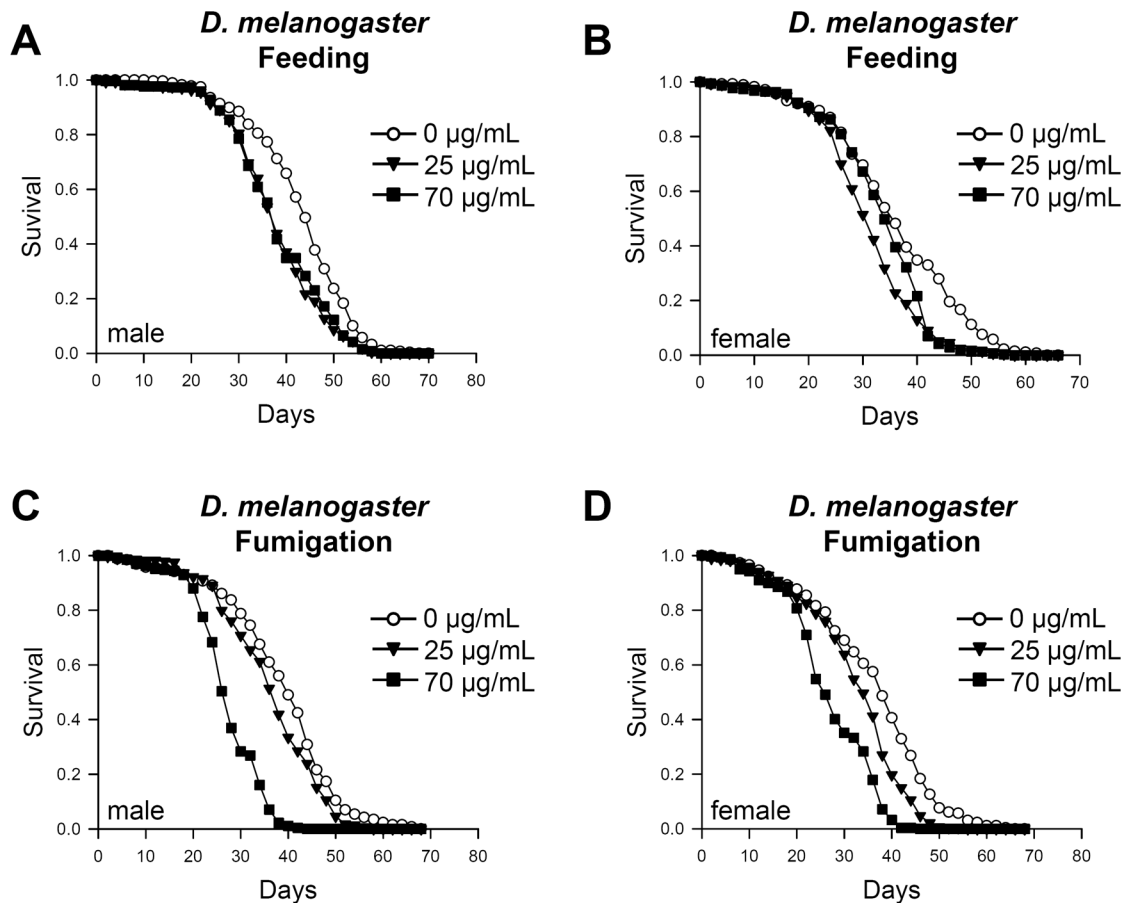

**Fig 1. Essential oil from *C. obtusa* reduces adult lifespan of fruit flies.** Lifespan of male and female flies decreased upon exposure to essential oil from *C. obtusa* by feeding (A, B) or fumigation (C, D). (A, C) Male. (B, D) Female.

doi:10.1371/journal.pone.0143450.g001

a food source significantly reduced the survival rates of flies in both sexes compared to the untreated group (Fig 1A and 1B,  $p < 0.0001$ ). Flies exposed to *C. obtusa* fumigant also showed significantly reduced survival rates in both sexes in a dose-dependent manner (Fig 1C and 1D,  $p < 0.0001$ ). The mean lifespan of flies exposed to fumigant of the essential oil (70 µg/ml) was significantly reduced by 29.5% in males and 25.2% in females (Table 2). Our data show that essential oil from *C. obtusa* is toxic to *Drosophila melanogaster*, and the effect is greater when delivered via fumigation versus food ingestion. Therefore, essential oil was delivered by fumigation in most of the following experiments.

### Effects of *C. obtusa* essential oil on development

Volatile chemicals emitted by plant oils such as cardamom oil as well as essential oils from poaceae and eucalyptus have been reported to prevent development of insects [23–25]. Effect of fumigant of *C. obtusa* essential oil on development of fruit flies was checked by measuring pupation ratio, which is the percentage of successful transformation from larvae to pupae, after exposure to essential oil fumigant. Unexpectedly, no significant difference in pupation ratio was detected in the 70 µg/ml of essential oil-treated group, whereas the ratio was slightly but significantly elevated in the 25 µg/ml of essential oil-treated group (Fig 2A, ANOVA test,  $p < 0.001$ ). Furthermore, the pupation ratio was significantly reduced by ingestion of food

**Table 2. Lifespan of fruit flies exposed to *C. obtusa* essential oil.**

| Exposure   | Sex    | Number of Flies | Mean Lifespan (day) | Maximum Lifespan (day) | P-value |         |
|------------|--------|-----------------|---------------------|------------------------|---------|---------|
| Feeding    | male   | 0 µg/mL         | 43.48±0.6           | 68                     |         |         |
|            |        | 25 µg/mL        | 37.9±0.6            | 60                     | <0.0001 |         |
|            |        | 70 µg/mL        | 38.25±0.64          | 60                     | <0.0001 |         |
|            | female | 0 µg/mL         | 276                 | 36.61±0.71             | 64      |         |
|            |        | 25 µg/mL        | 286                 | 31.36±0.53             | 58      | <0.0001 |
|            |        | 70 µg/mL        | 314                 | 33.56±0.52             | 58      | <0.0001 |
| Fumigation | male   | 0 µg/mL         | 38.9±0.74           | 68                     |         |         |
|            |        | 25 µg/mL        | 284                 | 36.43±0.6              | 58      | <0.0001 |
|            |        | 70 µg/mL        | 268                 | 27.43±0.43             | 42      | <0.0001 |
|            | female | 0 µg/mL         | 262                 | 36.47±0.77             | 66      |         |
|            |        | 25 µg/mL        | 274                 | 32.75±0.63             | 56      | <0.0001 |
|            |        | 70 µg/mL        | 279                 | 27.29±0.54             | 46      | <0.0001 |

doi:10.1371/journal.pone.0143450.t002

containing 25 µg/ml of essential oil (Fig 2B, ANOVA test,  $p < 0.001$ ). Since larvae of *D. melanogaster* cultured in the laboratory spend most of their lives feeding inside of semi-solid food, fumigants of the essential oil may not significantly affect the development of larvae residing inside food. In a subsequent experiment, parental flies were exposed to fumigants of essential oil for 10 days, and pupation ratio of offspring was examined. Pupation ratio markedly decreased in offspring of essential oil-exposed parents compared to the control (Fig 2C, ANOVA test,  $p < 0.001$ ).

### Effect of *C. obtusa* essential oil on locomotive activity

We next examined the motility of flies in response to *C. obtusa* essential oil. After exposure of flies to fumigants of essential oil for 10 days, negative geotaxis behavior of flies was observed. The climbing ability of flies exposed to fumigants of essential oil was significantly reduced in both males (Fig 3A, ANOVA test,  $p < 0.001$ ) and females (Fig 3B, ANOVA test,  $p < 0.05$ ) compared to the control. Especially, no female flies climbed up to 80 mm on test tubes when exposed to 70 µg/ml of essential oil fumigant.

### Effect of *C. obtusa* essential oil on fecundity

Effects of essential oil from *C. obtusa* on reproductive performance were examined since reproductive capacity is closely related to fitness in insects [26]. The average number of eggs laid per day by each female was not significantly affected by exposure to a low concentration of essential oil (Fig 4, 1–10 µg/ml). The average number of eggs laid per day by each female was  $48.8 \pm 8.62$  for control flies but decreased to  $40.38 \pm 5.03$  (ANOVA test,  $p < 0.05$ ) and  $9.88 \pm 2.78$  (ANOVA test,  $p < 0.0001$ ) upon exposure to fumigants of essential oil at concentrations of 25 or 70 µg/ml, respectively (Fig 4). Furthermore, flies exposed to 25 or 70 µg/ml of *C. obtusa* essential oil fumigant died within 4–5 or 1–2 days, respectively.

### Effects of *C. obtusa* essential oil on avoidance behavior

The repellent activity of essential oil from *C. obtusa* was examined. Based on T-maze assay, a choice chamber was designed to give flies two irreversible choices, one with essential oil and one without. The numbers of flies choosing each diet containing vial were recorded for 5 hours every 10 min. While fumigant of 10 µg/ml essential oil did not affect the avoidance behavior of

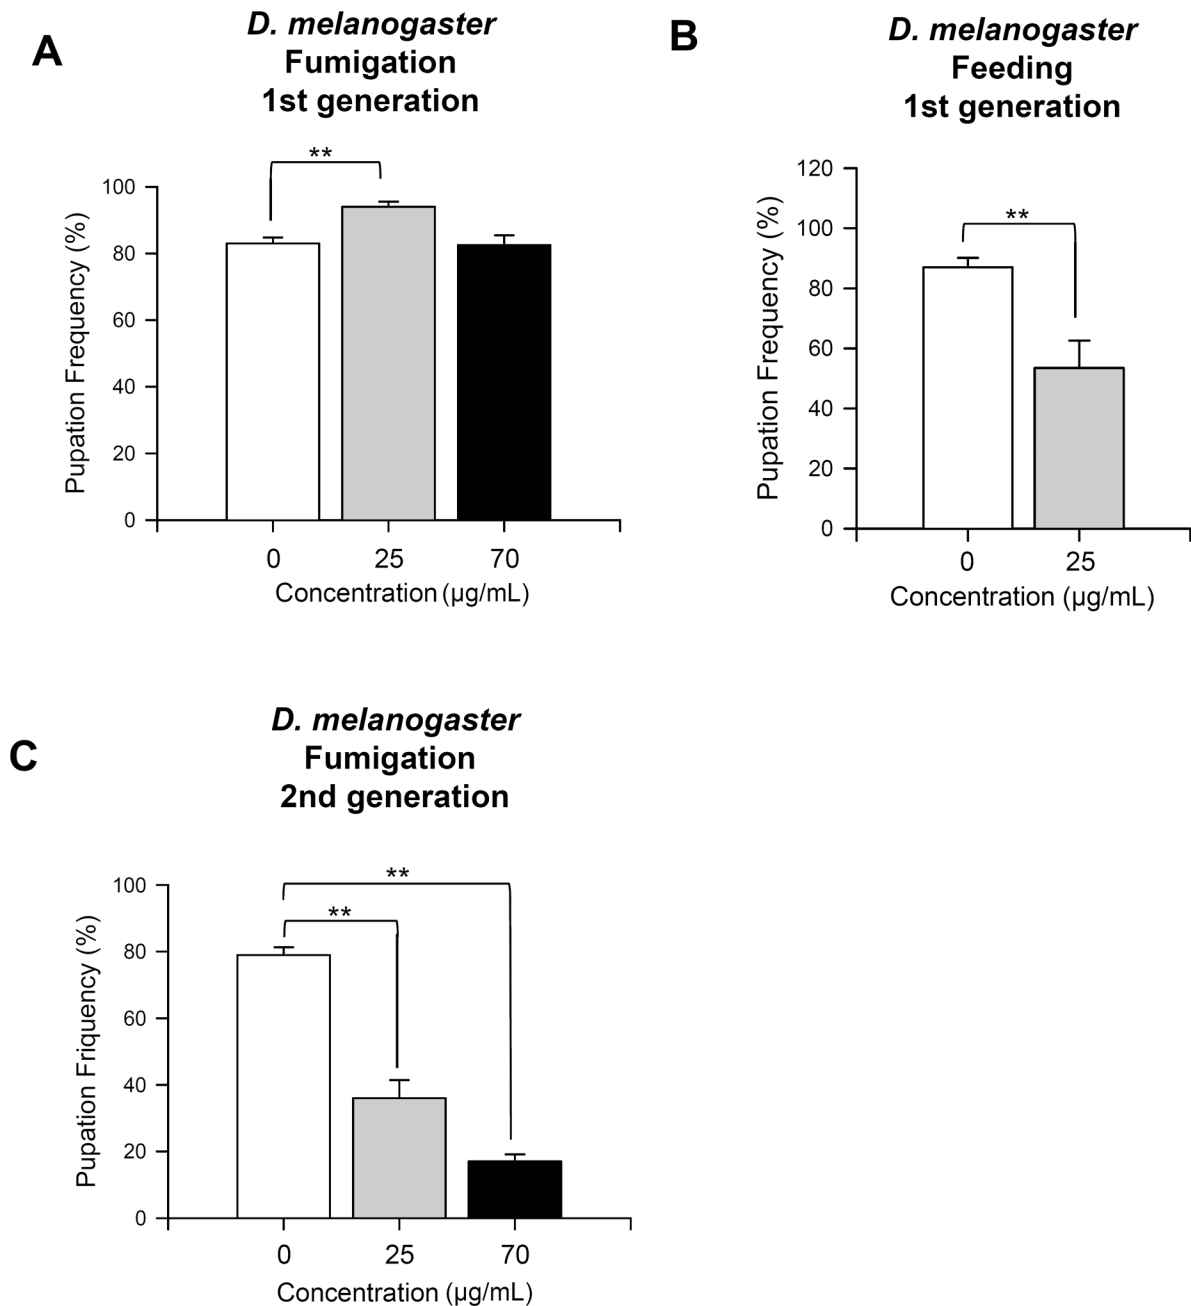

**Fig 2. Fumigation or feeding of *C. obtusa* essential oil affects pupation ratio of fruit flies.** (A) Transformation rate of eggs to pupae (pupation frequency) was not significantly altered by exposure to 70 µg/ml of *C. obtusa* essential oil fumigant, whereas fumigation of 25 µg/ml of essential oil slightly but significantly increased pupation frequency. (B) Pupation frequency of fruit flies was significantly reduced upon feeding of food mixed with essential oil. (C) Pupation frequency of offspring was significantly reduced upon exposure of parents to *C. obtusa* essential oil fumigant. \*\* $p < 0.001$ .

doi:10.1371/journal.pone.0143450.g002

fruit flies, fruit flies significantly avoided essential oil fumigant at 25–70 µg/ml in a dose-dependent manner (Fig 5A–5C). In addition, similar avoidance behavior was observed when house flies, *M. domestica*, were given a choice (Fig 5D). These results indicate that fumigant of *C. obtusa* essential oil has powerful repellent activity against flies.

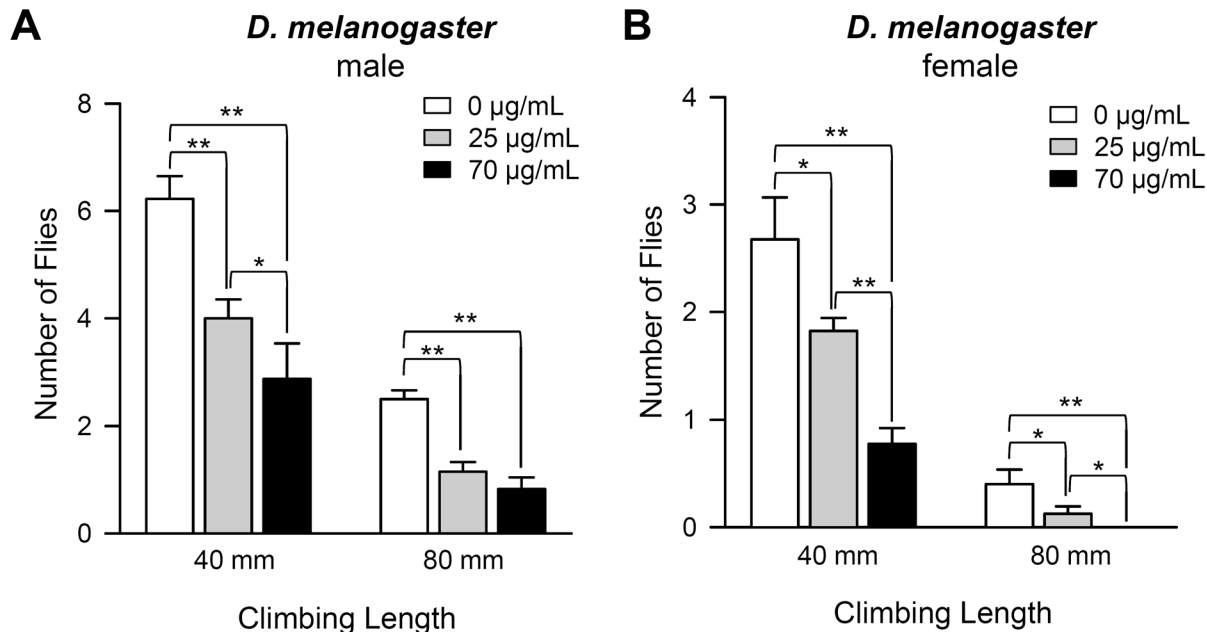

**Fig 3. Fumigation of *C. obtusa* essential oil reduces locomotive activity of fruit flies.** Climbing ability was reduced by fumigation of *C. obtusa* essential oil. (A) Male. (B) Female. \* $p < 0.05$ , \*\* $p < 0.01$ .

doi:10.1371/journal.pone.0143450.g003

### Duration time of essential oil fumigants

Use of essential oils as insect repellents has an efficacy problem since most essential oils are highly volatile [27]. We therefore examined the duration of repellency of *C. obtusa* essential oil fumigants using the choice chamber equipped with a funnel, similar to the experiment for repellent activity. Fruit flies were transferred to a choice chamber and given the choice immediately or 2, 4, or 6 hours after administration of 70 µg/ml *C. obtusa* essential oil. The flies started

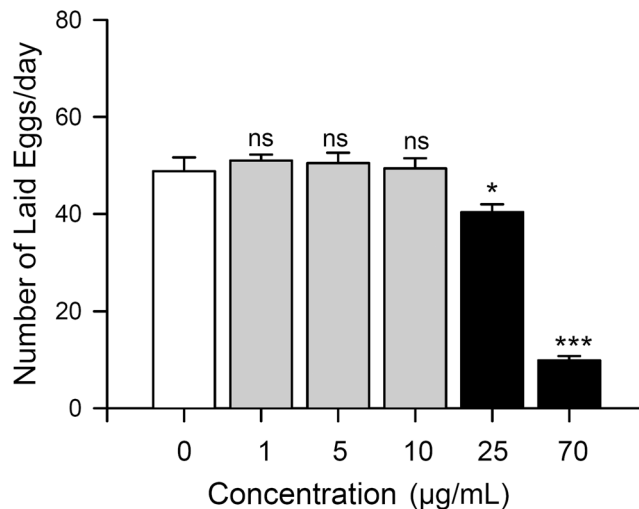

**Fig 4. Fumigation of *C. obtusa* reduces fecundity of female fruit flies.** Average number of eggs laid per day by female fruit flies significantly decreased upon exposure to 25 or 70 µg/ml of *C. obtusa* essential oil fumigant (black bars) but was not affected by exposure to 1–10 µg/ml of *C. obtusa* essential fumigant (gray bars). \* $p < 0.05$ , \*\*\* $p < 0.0001$ .

doi:10.1371/journal.pone.0143450.g004



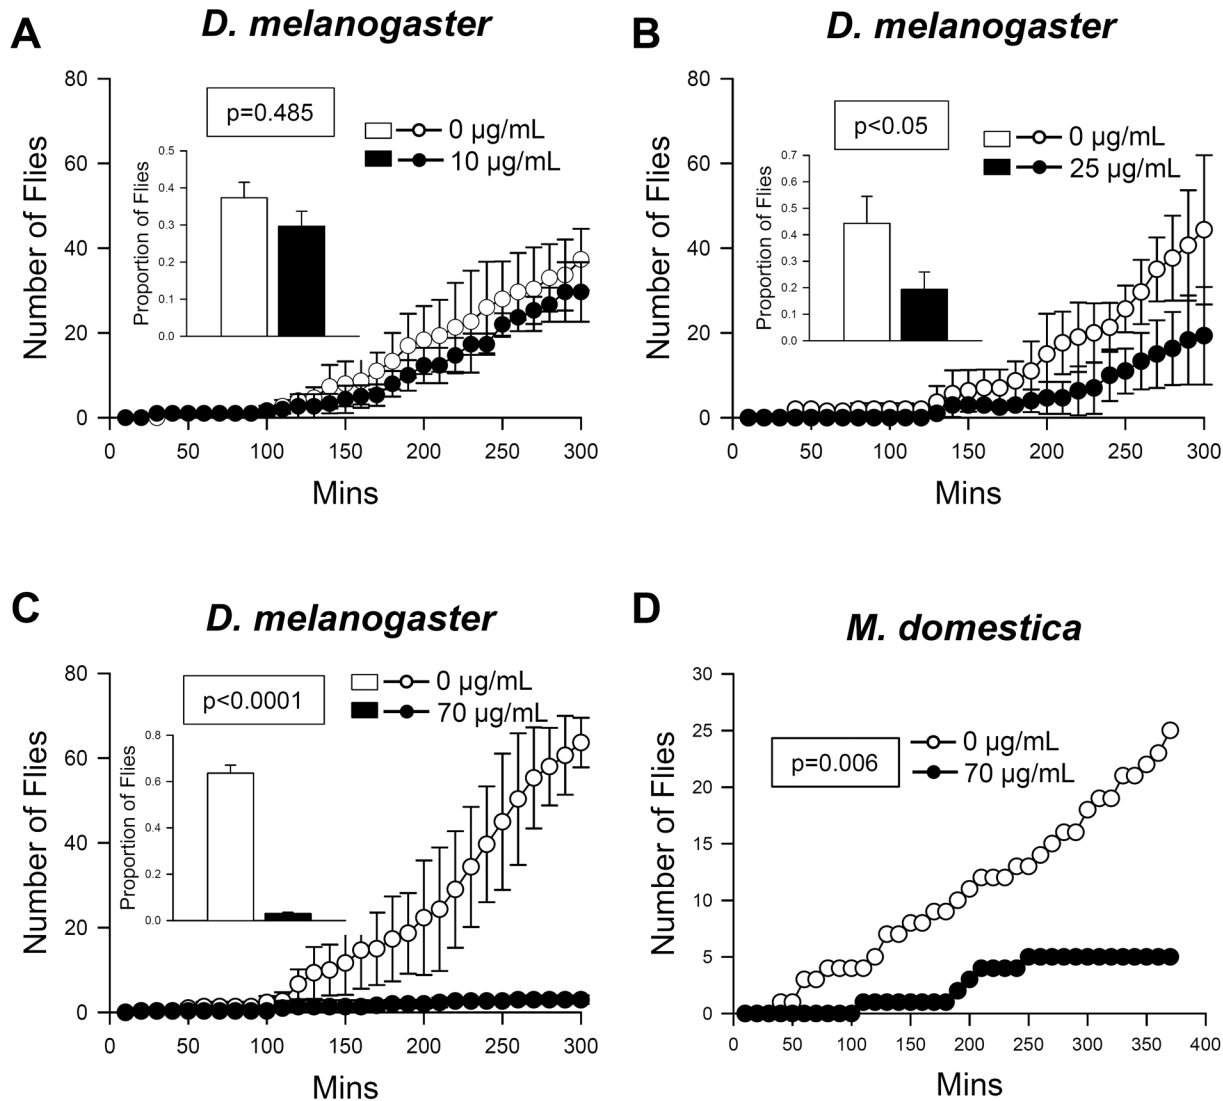

**Fig 5. Essential oil from *C. obtusa* repels fruit flies and house flies.** Fumigant of *C. obtusa* essential oil caused avoidance behaviors in fruit flies (A-C, *D. melanogaster*) and house flies (*D. M. domestica*). Inset graphs show the proportion of flies on each side at 300 minutes after setup. P values from a Chi-squared test are presented for each test.

doi:10.1371/journal.pone.0143450.g005

to enter the essential oil-containing vial at 280–300 min after essential oil administration (Fig 6A). Similarly, repellent activity was initially reduced (i. e. flies started to choose essential oil-containing vial) at ~ 300 min after essential oil administration (Fig 6B–6D). This indicates that fumigants of *C. obtusa* essential oil maintained avoidance activity for at least 5 hours.

## Discussion

Hinoki cypress (*Chamaecyparis obtusa*) is a familiar tree to the public due to its popularity in forest bathing in East Asia countries, including Korea, Japan, and China. Essential oils from other *Chamaecyparis* species have been reported to have insecticidal and antimicrobial activities. For example, essential oil from *Chamaecyparis lawsoniana* has larvicidal and repellent activities against Asian tiger mosquito, *Aedes albopictus* [28], as well as antibacterial activities against *Bacillus subtilis*, *Staphylococcus aureus*, and *Micrococcus luteus* [29]. Essential oil from

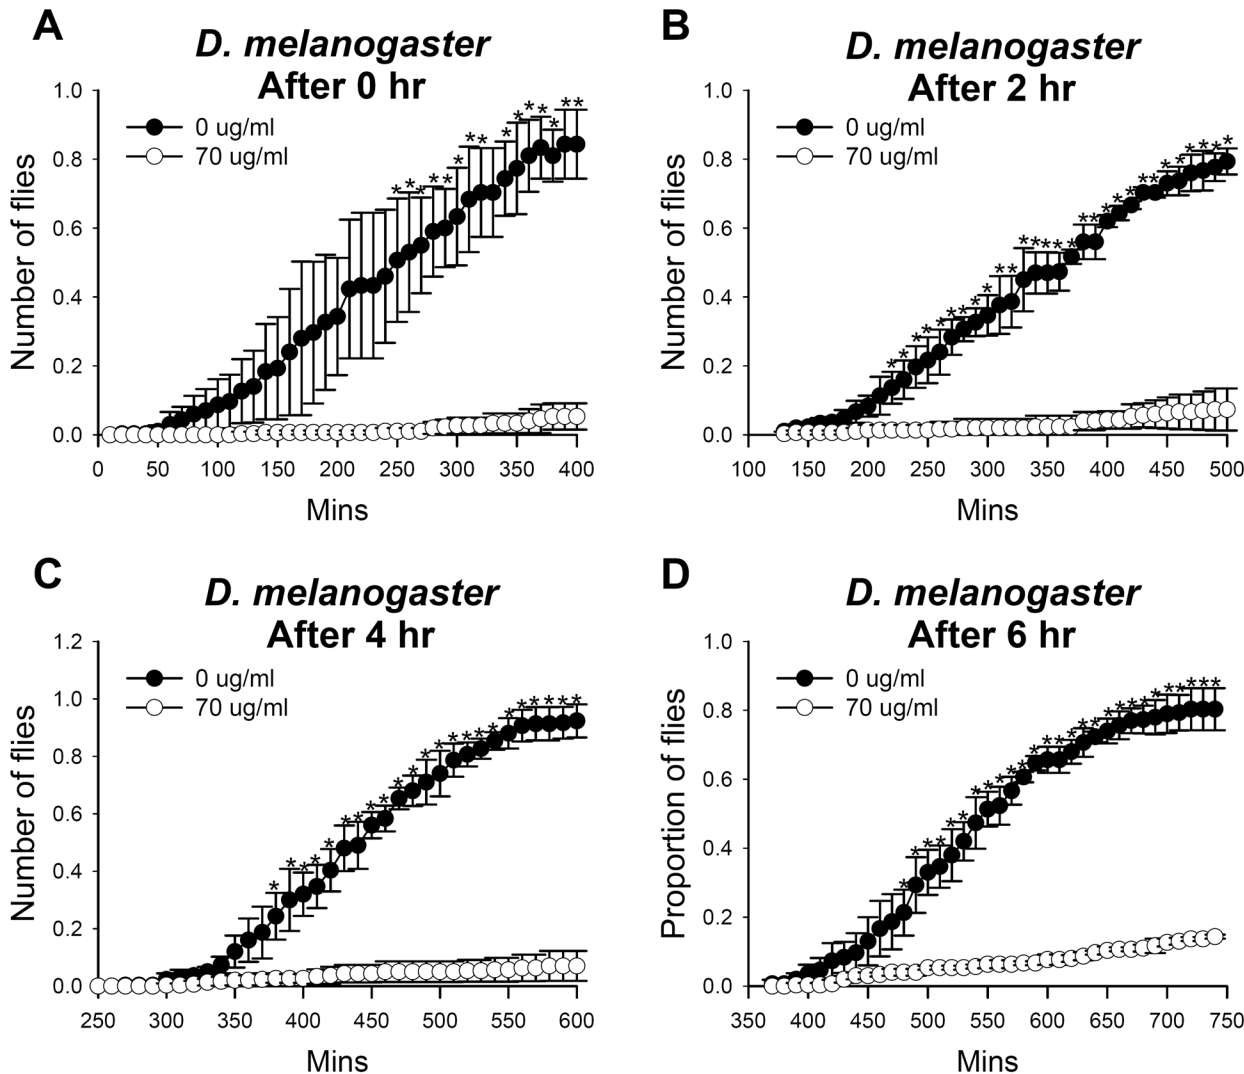

**Fig 6. Repellent activity of *C. obtusa* essential oil lasts for 5 hours.** Number of *D. melanogaster* choosing *C. obtusa* essential oil-containing vial was counted immediately or 2, 4, or 6 hours after administration of essential oil. Almost no flies were observed in *C. obtusa* essential oil-containing vial for 5 hours.

doi:10.1371/journal.pone.0143450.g006

*Chamaecypris formosensis* also has growth inhibitory activity against phytopathogenic fungi [30]. In this study, we showed that ingestion and fumigation of essential oil from *Chamaecypris obtusa* has insecticidal activity in fruit flies, *D. melanogaster*. Similarly, Park and colleagues demonstrated the insecticidal activity of *C. obtusa* essential oil against two pests, *Callosobruchus chinensis* and *Sitophilus oryzae* [17]. They showed that exposure to *C. obtusa* essential oil at a dose of 38 mg/ml resulted in mortality rates of 29% in *Callosobruchus chinensis* and 6% in *Sitophilus oryzae*. Intriguingly, it was recently reported that hot water extract of *C. obtusa* has antioxidant activity and extends the lifespan of *C. elegans* [31]. Several phytochemicals (catechin, quercetin, and myricetin) in the water extract may be responsible for the antioxidant and life-extending effects of *C. obtusa* in *C. elegans*, but phytochemicals were not found in essential oil used in our study (Table 1).

Fumigation of *C. obtusa* essential oil did not significantly reduce development of *Drosophila* larvae (Fig 2A). This can be attributed to limited access to the odor, since larvae reside within semi-solid food during most of their lives. Therefore, we investigated the effect of

parental odor exposure on development of offspring. Intriguingly, the developmental ratio of eggs to pupae was significantly reduced in a dose-dependent manner upon parental exposure to essential oil fumigant (Fig 2C). Several reports have studied the effects of essential oil on development of insects [27], but our findings are the first on the transgenerational effect of essential oil.

Fumigation of *C. obtusa* essential oil reduced locomotive activities of both sexes of fruit flies (Fig 3). Likewise, the neurotoxic effect of essential oil on insects has been documented in several studies. For example, *Lippia turbinata* essential oil was shown to reduce ambulation speed and total time in mosquito larvae (Kembro et al., 2009). In contrast to its neurotoxic effect on insects, essential oil from *C. obtusa* has been reported to have beneficial effects on neuronal health of mammals. Inhalation of *C. obtusa* essential oil can reduce anxiety-related behaviors [32], Alzheimer-related neuronal cell apoptosis, and memory dysfunction in rats [33]. In addition, biflavonoids from *C. obtusa* leaves were reported to have neuroprotective activity against glutamate-induced oxidative stress in mouse hippocampal cells [34], and essential oil from *C. obtusa* has anxiolytic-like and stress mitigation effects in mice [35]. These findings suggest that the underlying mechanisms of *C. obtusa* on neuronal function seem to be different between mammals and insects.

Fumigation of *C. obtusa* essential oil showed strong repellent effects on *D. melanogaster* and *M. domestica* (Fig 5). These results indicate that essential oil from *C. obtusa* can be used as a natural fly repellent. Many essential oils may not be suitable to be used as repellents due to their volatile nature and short half-life. However, essential oil from *C. obtusa* provided 100% repellency for 5 hours against *D. melanogaster* (Fig 6), comparable to the duration time of N, N, -ditethyl-meta-toluamide (DEET) [36]. Likewise, *Cymbopogon* plants provided repellent activity for 2–12 hours against mosquitoes [37].

Compositions of essential oils can differ by harvesting season, geographical source, and sampling part of the plant [5, 38, 39]. By GC-MS, the main components of *C. obtusa* essential oil used in this study were identified as  $\alpha$ -Terpinolene (19.45%), (+)-3-Carene (15.17%),  $\alpha$ -Pinene (10.12%), Sabinene (6.27%), and  $\gamma$ -Terpinene (4.77%) (Table 1). Similarly, several studies have showed that the major components of *C. obtusa* essential oil in Korea are Sabinene and (+)-2-Carene [40],  $\alpha$ -Terpinyl acetate and Sabinene [33, 41, 42], (+)-2-Carene and Sabinene [40], and Limonene, Bornyl acetate, and Sabinene [17]. Since bornyl acetate, Terpinolene, and  $\alpha$ -Phellandrene induce high mortality in *C. chinensis* and *S. oryzae* while Sabinene,  $\alpha$ -Pinene, and Myrcene do not [40], it will be interesting to determine the active components responsible for the insecticidal and repellent activities of *C. obtusa* essential oil.

Taken together, our data show that essential oil from *C. obtusa* has insecticidal activity and affects the fecundity, locomotive behavior, and development of fruit flies. In addition, essential oil has strong repellent activity in fruit flies and house flies with a duration time up to 5 hours. Together with the possible beneficial effects of *C. obtusa* on human health, our results suggest that *C. obtusa* essential oil can be potentially used as a 'human-friendly' insect repellent.

## Acknowledgments

The GC-MS data were provided by In The Forest Co., Ltd. (Seoul, Korea).

## Author Contributions

Conceived and designed the experiments: KJM. Performed the experiments: HSD. Analyzed the data: SHL KJM. Wrote the paper: SHL HSD KJM.

## References

1. Jones JD, Dangl JL. The plant immune system. *Nature*. 2006 Nov 16; 444(7117):323–9. PMID: [17108957](#)
2. Tsunetsugu Y, Park BJ, Miyazaki Y. Trends in research related to "Shinrin-yoku" (taking in the forest atmosphere or forest bathing) in Japan. *Environmental health and preventive medicine*. 2010 Jan; 15(1):27–37. doi: [10.1007/s12199-009-0091-z](#) PMID: [19585091](#)
3. Carson CF, Riley TV. Antimicrobial activity of the major components of the essential oil of *Melaleuca alternifolia*. *The Journal of applied bacteriology*. 1995 Mar; 78(3):264–9. PMID: [7730203](#)
4. Mourey A, Canillac N. Anti-*Listeria monocytogenes* activity of essential oils components of conifers. *Food Control*. 2002; 13(4–5).
5. Burt S. Essential oils: their antibacterial properties and potential applications in foods—a review. *International journal of food microbiology*. 2004 Aug 1; 94(3):223–53. PMID: [15246235](#)
6. Mihajilov-Krstev T, Jovanovic B, Jovic J, Ilic B, Miladinovic D, Matejic J, et al. Antimicrobial, antioxidative, and insect repellent effects of *Artemisia absinthium* essential oil. *Planta medica*. 2014 Dec; 80(18):1698–705. doi: [10.1055/s-0034-1383182](#) PMID: [25317772](#)
7. Fujimori H, Hisama M, Shibayama H, Iwaki M. Protecting effect of phytoncide solution, on normal human dermal fibroblasts against reactive oxygen species. *Journal of oleo science*. 2009; 58(8):429–36. PMID: [19584569](#)
8. Kawakami K, Kawamoto M, Nomura M, Otani H, Nabika T, Gonda T. Effects of phytoncides on blood pressure under restraint stress in SHRSP. *Clinical and experimental pharmacology & physiology*. 2004 Dec; 31 Suppl 2:S27–8.
9. Lee J, Park BJ, Tsunetsugu Y, Ohira T, Kagawa T, Miyazaki Y. Effect of forest bathing on physiological and psychological responses in young Japanese male subjects. *Public health*. 2011 Feb; 125(2):93–100. doi: [10.1016/j.puhe.2010.09.005](#) PMID: [21288543](#)
10. Mao GX, Lan XG, Cao YB, Chen ZM, He ZH, Lv YD, et al. Effects of short-term forest bathing on human health in a broad-leaved evergreen forest in Zhejiang Province, China. *Biomed Environ Sci*. 2012 Jun; 25(3):317–24. doi: [10.3967/0895-3988.2012.03.010](#) PMID: [22840583](#)
11. Li Q, Morimoto K, Kobayashi M, Inagaki H, Katsumata M, Hirata Y, et al. A forest bathing trip increases human natural killer activity and expression of anti-cancer proteins in female subjects. *Journal of biological regulators and homeostatic agents*. 2008 Jan-Mar; 22(1):45–55. PMID: [18394317](#)
12. Park YO, Kim SE, Kim YC. Action Mechanism of *Chamaecyparis obtusa* Oil on Hair Growth. *Toxicological research*. 2013 Dec 31; 29(4):241–7. doi: [10.5487/TR.2013.29.4.241](#) PMID: [24578794](#)
13. Lee GS, Hong EJ, Gwak KS, Park MJ, Choi KC, Choi IG, et al. The essential oils of *Chamaecyparis obtusa* promote hair growth through the induction of vascular endothelial growth factor gene. *Fitoterapia*. 2010 Jan; 81(1):17–24. doi: [10.1016/j.fitote.2009.06.016](#) PMID: [19576968](#)
14. Joo SS, Yoo YM, Ko SH, Choi W, Park MJ, Kang HY, et al. Effects of essential oil from *Chamaecyparis obtusa* on the development of atopic dermatitis-like skin lesions and the suppression of Th cytokines. *Journal of dermatological science*. 2010 Nov; 60(2):122–5. doi: [10.1016/j.jderm.2010.08.008](#) PMID: [20869850](#)
15. Ko J, Bao C, Park HC, Kim M, Choi HK, Kim YS, et al. beta-Thujaplicin modulates estrogen receptor signaling and inhibits proliferation of human breast cancer cells. *Bioscience, biotechnology, and biochemistry*. 2015 Feb 10:1–7.
16. Shih MF, Chen LY, Tsai PJ, Cherng JY. *In vitro* and *in vivo* therapeutics of beta-thujaplicin on LPS-induced inflammation in macrophages and septic shock in mice. *International journal of immunopathology and pharmacology*. 2012 Jan-Mar; 25(1):39–48. PMID: [22507316](#)
17. Park IK, Lee SG, Choi DH, Park JD, Ahn YJ. Insecticidal activities of constituents identified in the essential oil from leaves of *Chamaecyparis obtusa* against *Callosobruchus chinensis* (L.) and *Sitophilus oryzae* (L.). *Journal of Stored Products Research*. 2003; 39(4):375–84.
18. Lee SH, An HS, Jung YW, Lee EJ, Lee HY, Choi ES, et al. Korean mistletoe (*Viscum album coloratum*) extract extends the lifespan of nematodes and fruit flies. *Biogerontology*. 2014 Apr; 15(2):153–64. doi: [10.1007/s10522-013-9487-7](#) PMID: [24337961](#)
19. Bahndorff S, Kjærsgaard A, Pertoldi C, Loeschcke V, Schou TM, Skovgård H, et al. The effects of sex-ratio and density on locomotor activity in the house fly, *Musca domestica*. *Journal of Insect Science*. 2012; 12:71.
20. Gargano JW, Martin I, Bhandari P, Grotewiel MS. Rapid iterative negative geotaxis (RING): a new method for assessing age-related locomotor decline in *Drosophila*. *Experimental gerontology*. 2005 May; 40(5):386–95. PMID: [15919590](#)

21. Hada B, Yoo MR, Seong KM, Jin YW, Myeong HK, Min KJ. D-chiro-inositol and pinitol extend the life span of *Drosophila melanogaster*. The journals of gerontology. 2013 Mar; 68(3):226–34. doi: [10.1093/gerona/gls156](https://doi.org/10.1093/gerona/gls156) PMID: [22843669](https://pubmed.ncbi.nlm.nih.gov/22843669/)
22. Thany SH, Tong F, Bloomquist JR. Pre-treatment of *Stegomyia aegypti* mosquitoes with a sublethal dose of imidacloprid impairs behavioural avoidance induced by lemon oil and DEET. Medical and veterinary entomology. 2015 Mar; 29(1):99–103. doi: [10.1111/mve.12082](https://doi.org/10.1111/mve.12082) PMID: [25155403](https://pubmed.ncbi.nlm.nih.gov/25155403/)
23. Morrow PA, Fox L. Effects of variation in Eucalyptus essential oil yield on insect growth and grazing damage. Oecologia. 1980 1980/05/01; 45(2):209–19.
24. Huang Y, Lam SL, Ho SH. Bioactivities of essential oil from *Elletaria cardamomum* (L.) Maton. to *Sitophilus zeamais* Motschulsky and *Tribolium castaneum* (Herbst). Journal of Stored Products Research. 2000 4//; 36(2):107–17.
25. Ketoh GK, Koumaglo HK, Glitho IA. Inhibition of *Callosobruchus maculatus* (F.) (Coleoptera: Bruchidae) development with essential oil extracted from *Cymbopogon schoenanthus* L. Spreng. (Poaceae), and the wasp *Dinarmus basalis* (Rondani) (Hymenoptera: Pteromalidae). Journal of Stored Products Research. 2005 //; 41(4):363–71.
26. Pekkala N, Kotiaho JS, Puurtinen M. Laboratory relationships between adult lifetime reproductive success and fitness surrogates in a *Drosophila littoralis* population. PloS one. 2011; 6(9):e24560. doi: [10.1371/journal.pone.0024560](https://doi.org/10.1371/journal.pone.0024560) PMID: [21931756](https://pubmed.ncbi.nlm.nih.gov/21931756/)
27. Regnault-Roger C, Vincent C, Arnason JT. Essential oils in insect control: low-risk products in a high-stakes world. Annual review of entomology. 2012; 57:405–24. doi: [10.1146/annurev-ento-120710-100554](https://doi.org/10.1146/annurev-ento-120710-100554) PMID: [21942843](https://pubmed.ncbi.nlm.nih.gov/21942843/)
28. Giatropoulos A, Pitarokili D, Papaioannou F, Papachristos DP, Koliopoulos G, Emmanouel N, et al. Essential oil composition, adult repellency and larvicidal activity of eight Cupressaceae species from Greece against *Aedes albopictus* (Diptera: Culicidae). Parasitology research. 2013 Mar; 112(3):1113–23. doi: [10.1007/s00436-012-3239-5](https://doi.org/10.1007/s00436-012-3239-5) PMID: [23263252](https://pubmed.ncbi.nlm.nih.gov/23263252/)
29. Pala-Paul J, Usano-Aleman J, Granda E, Soria AC. Antifungal and antibacterial activity of the essential oil of *Chamaecyparis lawsoniana* from Spain. Natural product communications. 2012 Oct; 7(10):1383–6. PMID: [23157017](https://pubmed.ncbi.nlm.nih.gov/23157017/)
30. Ho CL, Hua KF, Hsu KP, Wang EI, Su YC. Composition and antipathogenic activities of the twig essential oil of *Chamaecyparis formosensis* from Taiwan. Natural product communications. 2012 Jul; 7(7):933–6. PMID: [22908586](https://pubmed.ncbi.nlm.nih.gov/22908586/)
31. Cheng SC, Li WH, Shi YC, Yen PL, Lin HY, Liao VH, et al. Antioxidant activity and delayed aging effects of hot water extract from *Chamaecyparis obtusa* var. *formosana* leaves. Journal of agricultural and food chemistry. 2014 May 7; 62(18):4159–65. doi: [10.1021/jf500842v](https://doi.org/10.1021/jf500842v) PMID: [24766147](https://pubmed.ncbi.nlm.nih.gov/24766147/)
32. Park HJ, Kim SK, Kang WS, Woo JM, Kim JW. Effects of essential oil from *Chamaecyparis obtusa* on cytokine genes in the hippocampus of maternal separation rats. Canadian journal of physiology and pharmacology. 2014 Feb; 92(2):95–101. doi: [10.1139/cjpp-2013-0224](https://doi.org/10.1139/cjpp-2013-0224) PMID: [24502631](https://pubmed.ncbi.nlm.nih.gov/24502631/)
33. Bae D, Seol H, Yoon HG, Na JR, Oh K, Choi CY, et al. Inhaled essential oil from *Chamaecyparis obtusa* ameliorates the impairments of cognitive function induced by injection of beta-amyloid in rats. Pharmaceutical biology. 2012 Jul; 50(7):900–10. doi: [10.3109/13880209.2011.642886](https://doi.org/10.3109/13880209.2011.642886) PMID: [22468783](https://pubmed.ncbi.nlm.nih.gov/22468783/)
34. Jeong EJ, Hwang L, Lee M, Lee KY, Ahn MJ, Sung SH. Neuroprotective biflavonoids of *Chamaecyparis obtusa* leaves against glutamate-induced oxidative stress in HT22 hippocampal cells. Food Chem Toxicol. 2014 Feb; 64:397–402. doi: [10.1016/j.fct.2013.12.003](https://doi.org/10.1016/j.fct.2013.12.003) PMID: [24315869](https://pubmed.ncbi.nlm.nih.gov/24315869/)
35. Kasuya H, Hata E, Satou T, Yoshikawa M, Hayashi S, Masuo Y, et al. Effect on emotional behavior and stress by inhalation of the essential oil from *Chamaecyparis obtusa*. Natural product communications. 2013 Apr; 8(4):515–8. PMID: [23738468](https://pubmed.ncbi.nlm.nih.gov/23738468/)
36. Salafsky B, He YX, Li J, Shibuya T, Ramaswamy K. Short report: study on the efficacy of a new long-acting formulation of N, N-diethyl-m-toluamide (DEET) for the prevention of tick attachment. The American journal of tropical medicine and hygiene. 2000 Feb; 62(2):169–72. PMID: [10813468](https://pubmed.ncbi.nlm.nih.gov/10813468/)
37. Nerio LS, Olivero-Verbel J, Stashenko E. Repellent activity of essential oils: a review. Bioresource technology. 2010 Jan; 101(1):372–8. doi: [10.1016/j.biortech.2009.07.048](https://doi.org/10.1016/j.biortech.2009.07.048) PMID: [19729299](https://pubmed.ncbi.nlm.nih.gov/19729299/)
38. Delaquis PJ, Stanich K, Girard B, Mazza G. Antimicrobial activity of individual and mixed fractions of dill, cilantro, coriander and eucalyptus essential oils. International journal of food microbiology. 2002 Mar 25; 74(1–2):101–9. PMID: [11929164](https://pubmed.ncbi.nlm.nih.gov/11929164/)
39. Juliano C, Mattana A, Usai M. Composition and in vitro antimicrobial activity of the essential oil of *Thymus herba-barona* Loisel growing wild in Sardinia. Journal of Essential Oil Research. 2000 Jul-Aug; 12(4):516–22.
40. Lee JH, Lee BK, Kim JH, Lee SH, Hong SK. Comparison of chemical compositions and antimicrobial activities of essential oils from three conifer trees; *Pinus densiflora*, *Cryptomeria japonica*, and

*Chamaecyparis obtusa*. Journal of microbiology and biotechnology. 2009 Apr; 19(4):391–6. PMID: [19420996](#)

41. Yang JK, Choi MS, Seo WT, Rinker DL, Han SW, Cheong GW. Chemical composition and antimicrobial activity of *Chamaecyparis obtusa* leaf essential oil. Fitoterapia. 2007 Feb; 78(2):149–52. PMID: [17161919](#)
42. Hong EJ, Na KJ, Choi IG, Choi KC, Jeung EB. Antibacterial and antifungal effects of essential oils from coniferous trees. Biological & pharmaceutical bulletin. 2004 Jun; 27(6):863–6.
